# Supplementary material for: Synthesis of a series of Pd(ii) complexes of the type [Pd(1,10-phen)(SRF)2]: an interesting case of solvatomorphism
Source: Royal Society of Chemistry journal article supplement (doi:10.1039/d2ce01319c), 2022-01-01
Supplement: d2ce01319c1.pdf [file d2ce01319c1.pdf]

# Synthesis of a Series of Pd(II) Complexes of the Type [Pd(1,10-phen)(SR<sub>F</sub>)<sub>2</sub>]·Solvent. An Interesting Case of Solvatomorphism.

Hugo Juarez-Garrido<sup>a</sup>, Juan Manuel Germán-Acacio<sup>b\*</sup>, Everardo Jaime-Adán<sup>a</sup>, Joaquín Barroso-Flores<sup>c</sup>, Victor Lara<sup>d</sup>, Reyna Reyes-Martinez<sup>a</sup>, Ruben A. Toscano<sup>a</sup>, Simón Hernández-Ortega<sup>a</sup> and David Morales-Morales<sup>a\*</sup>

<sup>a</sup>Instituto de Química, Universidad Nacional Autónoma de México, Circuito Exterior, Ciudad Universitaria, Ciudad de México. C. P. 04510, México. <sup>b</sup>Red de Apoyo a la Investigación, Universidad Nacional Autónoma de México-CIC, Instituto Nacional de Ciencias Médicas y Nutrición SZ, C. P.14000, Ciudad de México, México. <sup>c</sup>CCIQS-UAEM-UNAM. Instituto de Química. Universidad Nacional Autónoma de México. Carretera Toluca-Atacomulco Km 14.5 CP 50200 Toluca, Estado de México, México. <sup>d</sup>Universidad Autónoma Metropolitana, Iztapalapa, Av. San Rafael Atlixco No. 186, Col. Vicentina, 09340 Ciudad de México, México.

Corresponding authors: [jmga@cic.unam.mx](mailto:jmga@cic.unam.mx); [damor@unam.mx](mailto:damor@unam.mx)

- Figure S1            Molecular structures **1-5** with numbering
- Table S1            Relevant metal-ligand bonds lengths and angles in the structures **1-5**
- Figure S2           Visualization of the  $\pi_F$ - $\pi_F$ ,  $\pi$ - $\pi$  and  $\pi_F$ - $\pi$  interactions (intra- and intermolecular) in **1**. Colored in red are the crystallographic independent molecules Pd1.
- Figure S3           Schematization of the *phen*···*phen* intermolecular interactions (*head-to-tail*) forming the parallel infinite column (molecule Pd1).
- Figure S4           Visualization of the *phen*···*phen*  $\pi$ - $\pi$  intermolecular interactions (intra- and intermolecular) in **2**. C<sub>6</sub>H<sub>6</sub> solvate is drawing in ball and stick style. Colored in red are the crystallographic independent molecules Pd1.
- Figure S5           *phen*···*phen* interactions in **2**. Colored in red is the crystallographic independent molecule Pd1.
- Figure S6           Projections presenting *phen*···*phen* interactions distorted from a perfect *head-to-tail* orientation in **2**. Colored in red is the crystallographic independent molecules Pd1.
- Figure S7           Visualization of the  $\pi_F$ - $\pi_F$  interactions (intra- and intermolecular) in **2**. Colored in red are the Pd1 molecules.
- Figure S8.           Visualization of the  $\pi_F$ - $\pi_F$  and *phen*···*phen*  $\pi$ - $\pi$  interactions (intra- and intermolecular) in **3**. C<sub>6</sub>H<sub>6</sub>Cl solvate is drawing in ball and stick style. Colored in red are the crystallographic independent molecules Pd1.

- Figure S9                      Projections presenting *phen*···*phen* interactions distorted from a perfect *head-to-tail* orientation in **3**. Colored in red is the crystallographic independent molecules Pd1.
- Figure S10                     Visualization of the  $\pi$ - $\pi$  interactions (intermolecular) in **4**. C<sub>6</sub>H<sub>6</sub>Br solvate is drawing in ball and stick style. Colored in red are the crystallographic independent molecules Pd1.
- Figure S11                     Projections presenting *phen*···*phen* interactions displaced from a perfect *headto-tail* and *head-to-head* orientation in **4**. Colored in red is the crystallographic independent molecules Pd1.
- Figure S12                     Visualization of the  $\pi$ - $\pi$  interactions (intermolecular) in **5**. C<sub>6</sub>H<sub>6</sub>Br solvate is drawing in ball and stick style.
- Figure S13                     Relevant non-covalent interactions involved around the Pd1 (colored in red) and Pd2 in the structures **1-5**.
- Figure S14                     HOMO – LUMO plots for structures **1-5** and the interaction *phen*···C<sub>6</sub>H<sub>5</sub>Br.

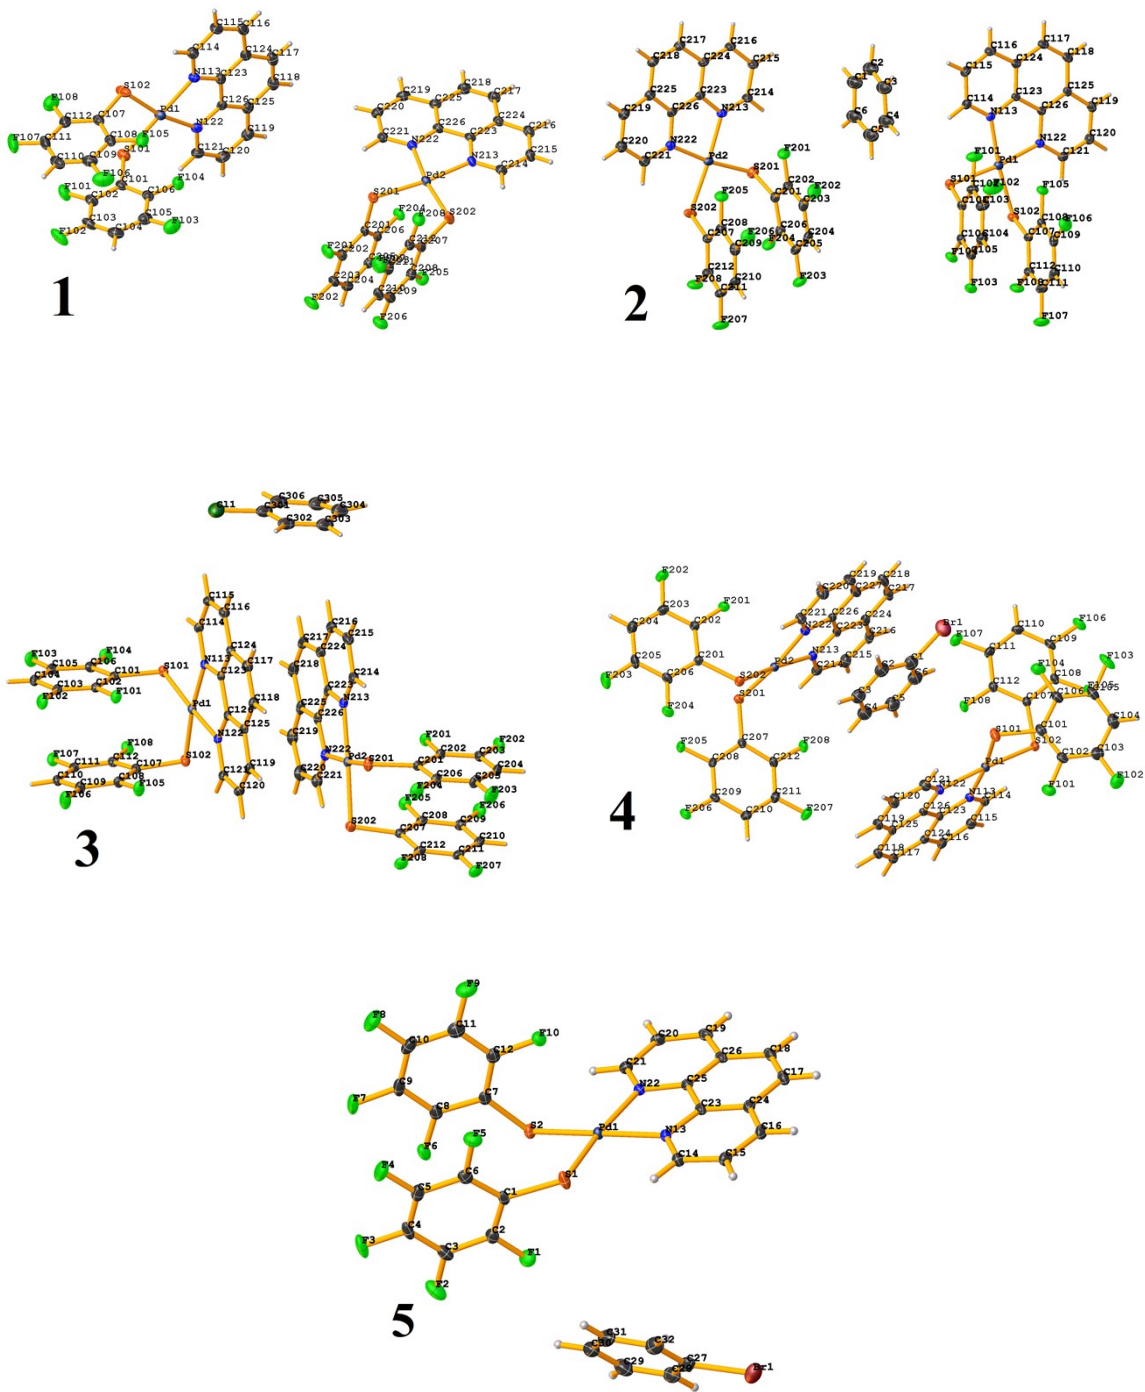

**Figure S1.** Molecular structures 1-5 with numbering. Ellipsoids were drawn at 30% of probability.

| 1 | 2 | 3 | 4 | 5 |
|---|---|---|---|---|
|---|---|---|---|---|

### Bond lengths [Å]

|                   |                   |                   |                   |                  |
|-------------------|-------------------|-------------------|-------------------|------------------|
| Pd1-N113 2.087(4) | Pd1-S101 2.289(1) | Pd1-S101 2.296(1) | Pd1-S101 2.280(2) | Pd1-S1 2.2678(8) |
| Pd1-N122 2.093(4) | Pd1-S102 2.287(1) | Pd1-S102 2.290(1) | Pd1-S102 2.282(2) | Pd1-S2 2.2861(9) |
| Pd1-S101 2.302(1) | Pd1-N113 2.101(3) | Pd1-N113 2.100(3) | Pd1-N113 2.080(4) | Pd1-N13 2.086(2) |
| Pd1-S102 2.267(1) | Pd1-N122 2.097(4) | Pd1-N122 2.104(3) | Pd1-N122 2.086(4) | Pd1-N22 2.094(2) |
| Pd2-N213 2.081(4) | S201-Pd2 2.293(2) | Pd2-S201 2.289(1) | Pd2-S201 2.285(2) |                  |
| Pd2-N222 2.077(4) | S202-Pd2 2.279(1) | Pd2-S202 2.298(1) | Pd2-S202 2.288(2) |                  |
| Pd2-S201 2.287(1) | Pd2-N213 2.05(1)  | Pd2-N213 2.088(4) | Pd2-N213 2.081(5) |                  |
| Pd2-S202 2.265(1) | Pd2-N222 2.08(2)  | Pd2-N222 2.083(3) | Pd2-N222 2.084(5) |                  |

### Angles [°]

|                      |                        |                         |                        |                        |
|----------------------|------------------------|-------------------------|------------------------|------------------------|
| S1-Pd1-S2 95.16(3)   | S101-Pd1-S102 92.74(6) | S101-Pd1-S102 90.66(4)  | S101-Pd1-S102 90.83(5) | S101-Pd1-S102 93.65(5) |
| S1-Pd1-N13 90.53(7)  | S101-Pd1-N113 172.4(1) | S101-Pd1-N113 94.21(8)  | S101-Pd1-N113 95.6(1)  | S101-Pd1-N113 172.3(1) |
| S1-Pd1-N22 170.49(8) | S101-Pd1-N122 93.1(1)  | S101-Pd1-N122 173.72(8) | S101-Pd1-N122 173.0(1) | S101-Pd1-N122 94.8(1)  |
| S2-Pd1-N13 172.97(8) | S102-Pd1-N113 94.6(1)  | S102-Pd1-N113 173.46(8) | S102-Pd1-N113 173.4(1) | S102-Pd1-N113 91.3(1)  |
| S2-Pd1-N22 94.32(7)  | S102-Pd1-N122 174.1(1) | S102-Pd1-N122 95.51(8)  | S102-Pd1-N122 94.3(1)  | S102-Pd1-N122 169.4(1) |
| N13-Pd1-N22 80.1(1)  | N113-Pd1-N122 79.6(2)  | N113-Pd1-N122 79.7(1)   | N113-Pd1-N122 79.4(1)  | N113-Pd1-N122 79.6(1)  |
| Pd1-S1-C1 114.6(1)   | Pd1-S101-C101 110.2(2) | Pd1-S101-C101 108.0(1)  | Pd1-S101-C101 102.5(2) | Pd1-S101-C101 107.9(2) |
| Pd1-S2-C7 108.2(1)   | Pd1-S102-C107 107.0(2) | Pd1-S102-C107 102.7(1)  | Pd1-S102-C107 107.9(2) | Pd1-S102-C107 113.2(2) |
| Pd1-N13-C14 129.1(2) | Pd1-N113-C114 129.2(4) | Pd1-N113-C114 128.9(2)  | Pd1-N113-C114 129.1(3) | Pd1-N113-C114 129.2(3) |
| Pd1-N13-C23 112.6(2) | Pd1-N113-C123 113.4(3) | Pd1-N113-C123 112.6(2)  | Pd1-N113-C123 112.3(3) | Pd1-N113-C123 112.7(3) |
| Pd1-N22-C21 129.2(2) | Pd1-N122-C121 128.6(4) | Pd1-N122-C121 129.3(3)  | Pd1-N122-C121 128.5(3) | Pd1-N122-C121 129.2(3) |
| Pd1-N22-C25 112.4(2) | Pd1-N122-C126 112.9(3) | Pd1-N122-C126 112.1(2)  | Pd1-N122-C126 112.8(3) | Pd1-N122-C126 112.4(3) |
|                      | S201-Pd2-S202 90.21(6) | S201-Pd2-S202 90.02(4)  | C201-S201-Pd2 99.7(2)  | S201-Pd2-S202 94.74(5) |
|                      | S201-Pd2-N213 96.1(1)  | S201-Pd2-N213 95.0(1)   | C207-S202-Pd2 108.4(2) | S201-Pd2-N213 173.9(1) |
|                      | S201-Pd2-N222 170.5(1) | S201-Pd2-N222 173.6(1)  | S201-Pd2-S202 89.92(5) | S201-Pd2-N222 94.2(1)  |
|                      | S202-Pd2-N213 171.1(1) | S202-Pd2-N213 174.9(1)  | S201-Pd2-N213 91.8(4)  | S202-Pd2-N213 90.9(1)  |
|                      | S202-Pd2-N222 95.1(1)  | S202-Pd2-N222 94.9(1)   | S201-Pd2-N222 172.7(6) | S202-Pd2-N222 171.0(1) |
|                      | N213-Pd2-N222 79.5(2)  | N213-Pd2-N222 80.1(1)   | S202-Pd2-N213 175.4(4) | N213-Pd2-N222 80.2(1)  |
|                      | Pd2-S201-C207 106.7(2) | Pd2-S201-C201 108.3(1)  | S202-Pd2-N222 97.4(6)  | Pd2-S201-C201 107.4(1) |
|                      | Pd2-S202-C201 107.2(2) | Pd2-S202-C207 100.2(1)  | N213-Pd2-N222 80.9(7)  | Pd2-S202-C207 113.4(2) |

|                        |                        |                        |                        |
|------------------------|------------------------|------------------------|------------------------|
| Pd2-N213-C214 128.2(4) | Pd2-N213-C214 129.2(3) | Pd2-N213-C214 129(1)   | Pd2-N213-C214 129.7(3) |
| Pd2-N213-C223 113.2(4) | Pd2-N213-C223 112.0(2) | Pd2-N213-C223 112.9(9) | Pd2-N213-C223 112.5(3) |
| Pd2-N222-C221 128.7(4) | Pd2-N222-C221 128.7(3) | Pd2-N222-C221 132(1)   | Pd2-N222-C221 129.9(3) |
| Pd2-N222-C226 112.6(4) | Pd2-N222-C226 112.9(2) | Pd2-N222-C226 113(1)   | Pd2-N222-C226 112.9(3) |

Table S1 Relevant metal-ligand bonds lengths and angles in the structures 1-5

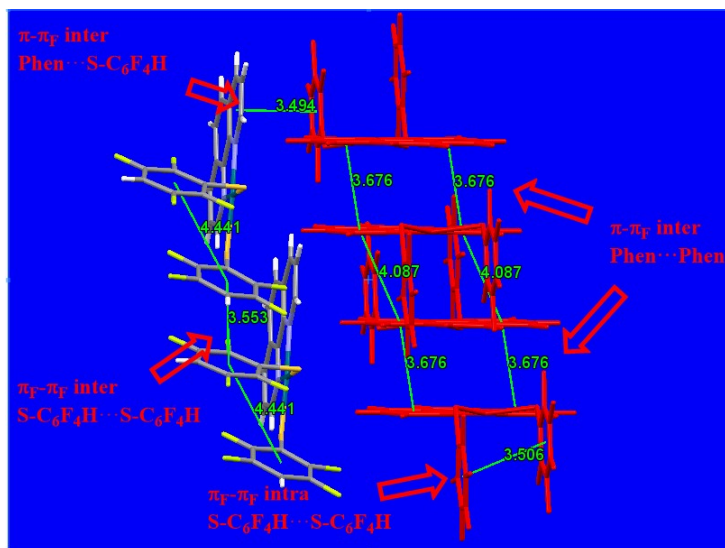

Figure S2. Visualization of the  $\pi_F$ - $\pi_F$ ,  $\pi$ - $\pi$  and  $\pi_F$ - $\pi$  interactions (intra- and intermolecular) in 1. Colored in red are the crystallographic independent molecules Pd1.

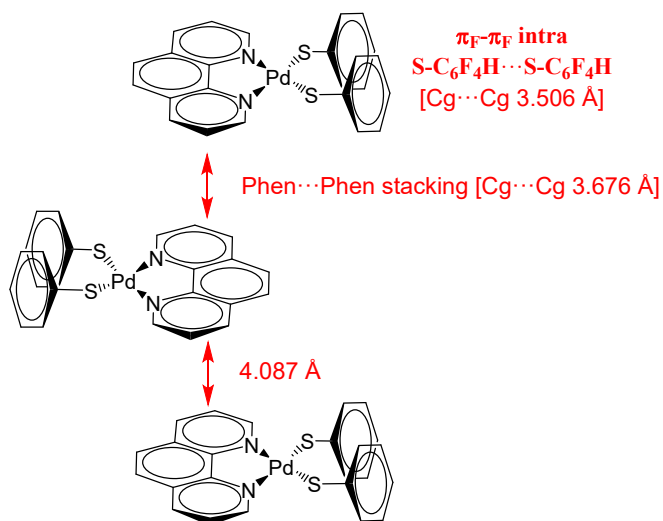

Figure S3. Schematization of the *phen*...*phen* intermolecular interactions (*head-to-tail*) forming the parallel infinite column (molecule Pd1).

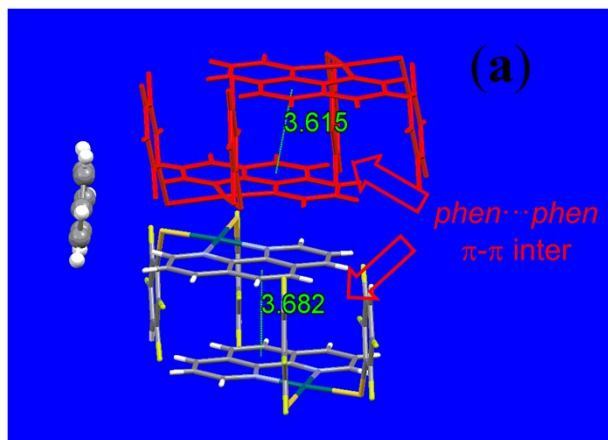

**Figure S4.** Visualization of the *phen*...*phen*  $\pi$ - $\pi$  intermolecular interactions (intra- and intermolecular) in **2**.  $C_6H_6$  solvate is drawing in ball and stick style. Colored in red are the crystallographic independent molecules Pd1.

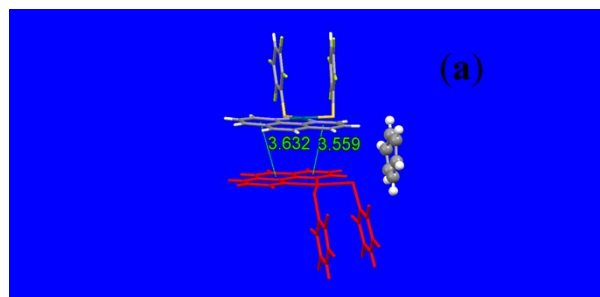

**Figure S5.** *Phen*...*phen* interactions in **2**. Colored in red is the crystallographic independent molecule Pd1.

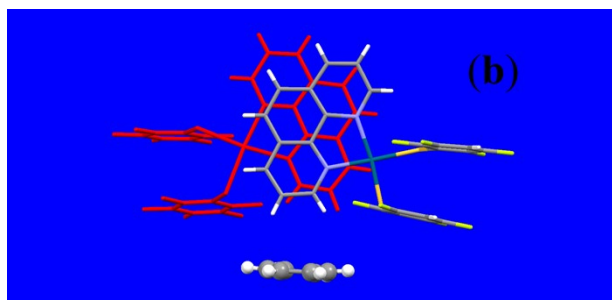

**Figure S6.** Projections presenting *phen*...*phen* interactions distorted from a perfect *head-to-tail* orientation in **2**. Colored in red is the crystallographic independent molecule Pd1.

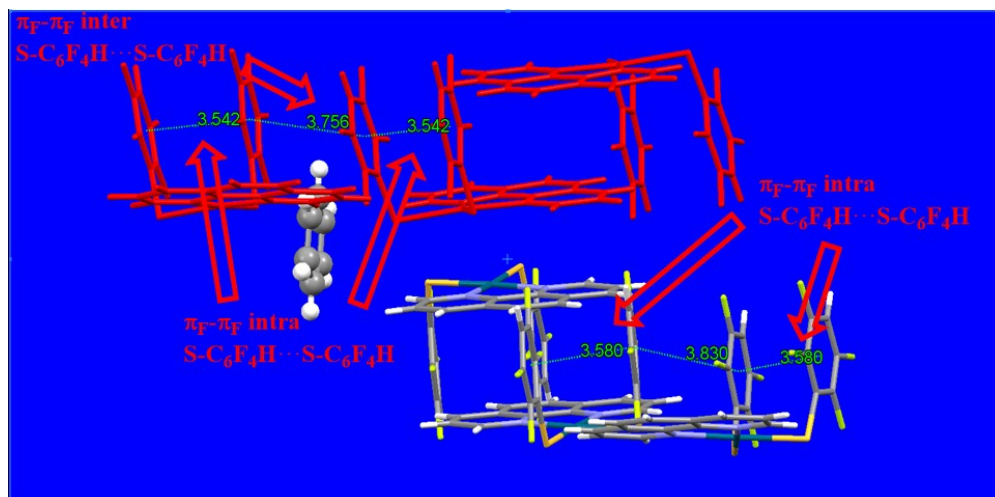

**Figure S7.** Visualization of the  $\pi_F$ - $\pi_F$  interactions (intra- and intermolecular) in **2**. Colored in red are the Pd1 molecules.

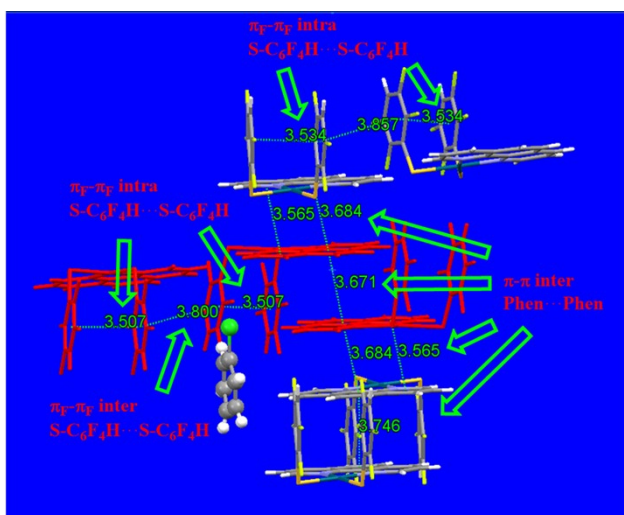

**Figure S8.** Visualization of the  $\pi_F$ - $\pi_F$  and *phen...phen*  $\pi$ - $\pi$  interactions (intra- and intermolecular) in **3**.  $C_6H_6Cl$  solvate is drawing in ball and stick style. Colored in red are the crystallographic independent molecules Pd1.

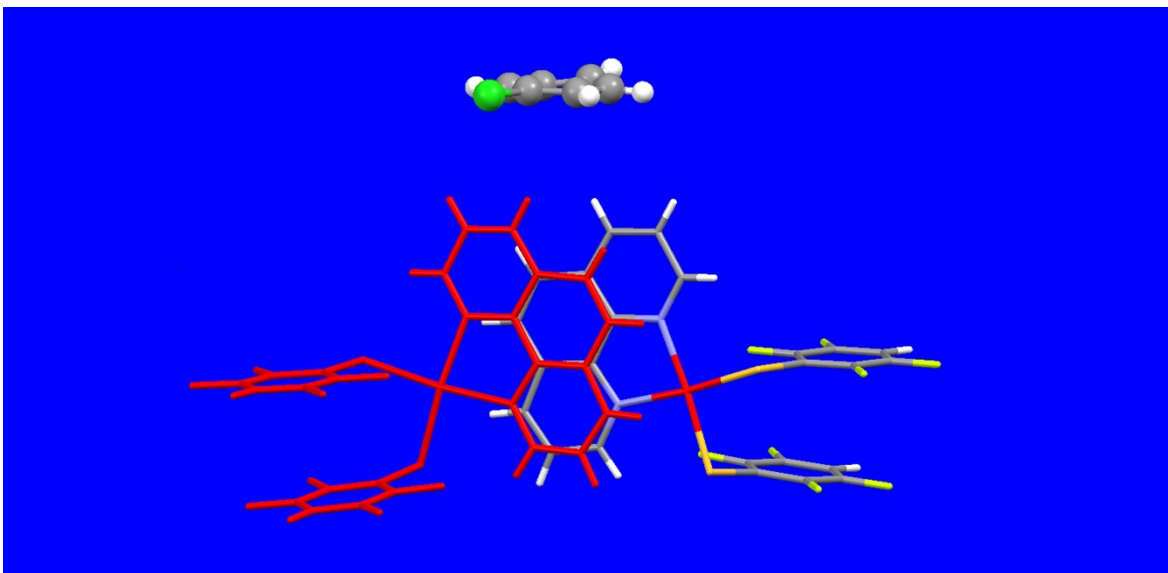

**Figure S9.** Projections presenting *phen*⋯*phen* interactions distorted from a perfect *head-to-tail* orientation in **3**. Colored in red is the crystallographic independent molecules Pd1.

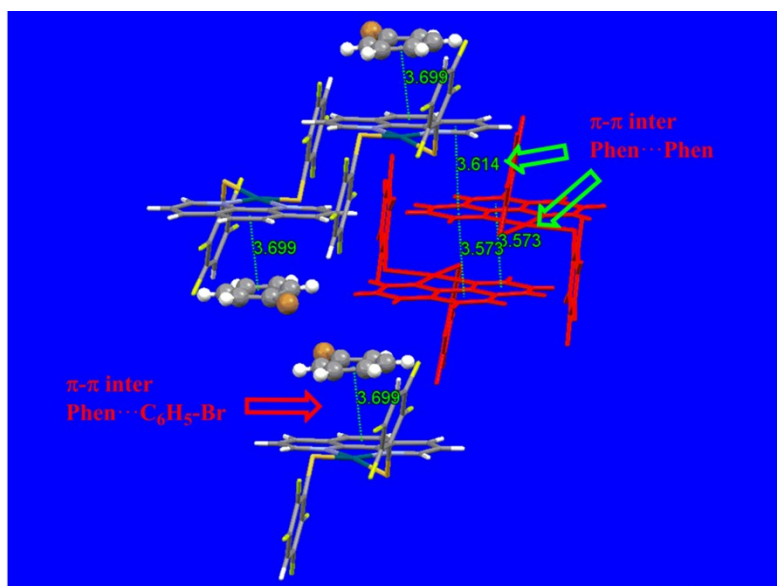

**Figure S10.** Visualization of the  $\pi$ - $\pi$  interactions (intermolecular) in **4**.  $C_6H_6Br$  solvate is drawing in ball and stick style. Colored in red are the crystallographic independent molecules Pd1.

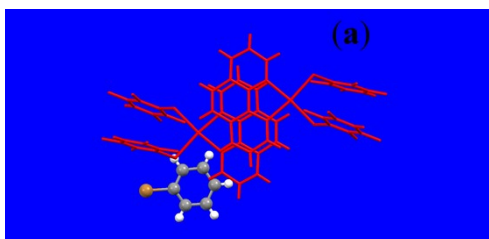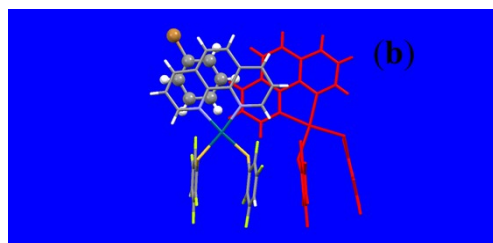



**Figure S11.** Projections presenting *phen*⋯*phen* interactions displaced from a perfect *head to-tail* and *head-to-head* orientation in **4**. Colored in red is the crystallographic independent molecules Pd1.

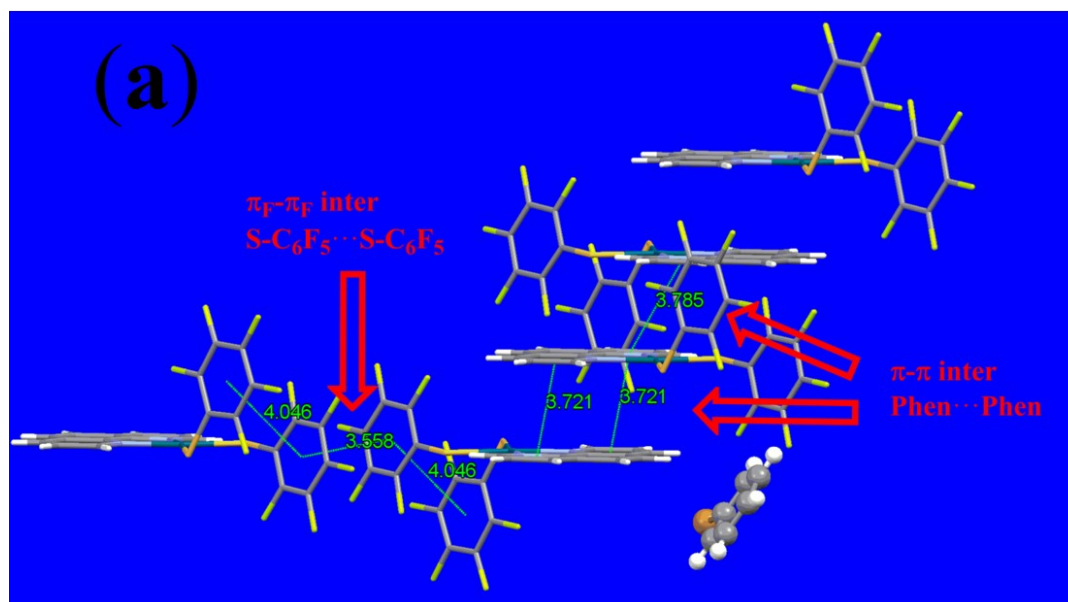

Figure S12. Visualization of the  $\pi$ - $\pi$  interactions (intermolecular) in **5**. C<sub>6</sub>H<sub>6</sub>Br solvate is drawing in ball and stick style.

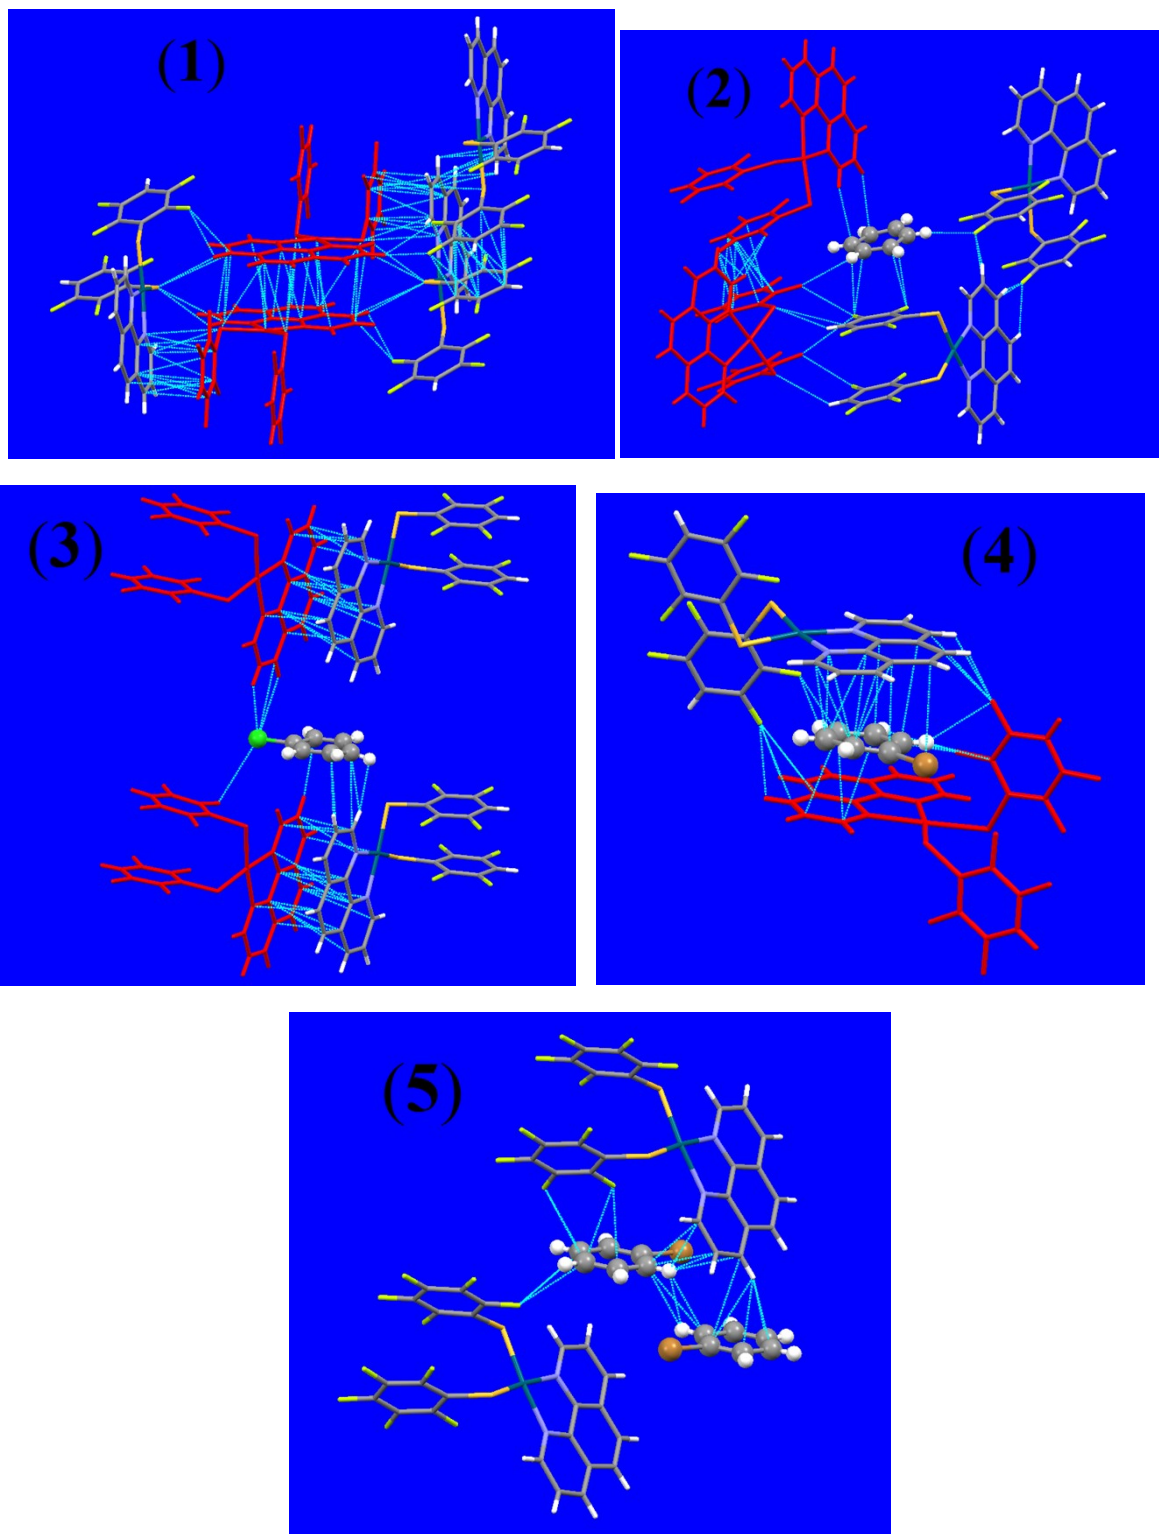

**Figure S5.** Relevant non-covalent interactions involved around the Pd1 (colored in red) and Pd2 in the structures 1-5.

---

---

**HOMO**

**LUMO**

---

2

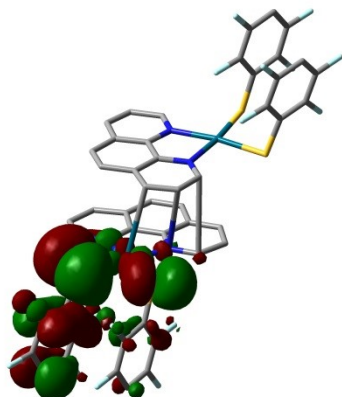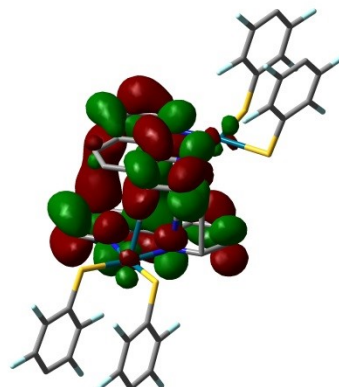

3

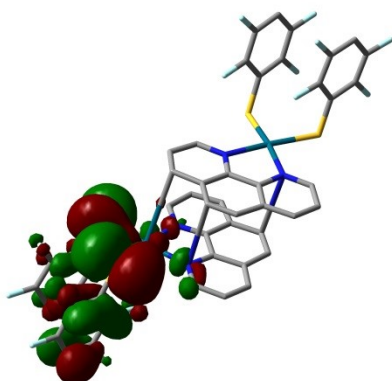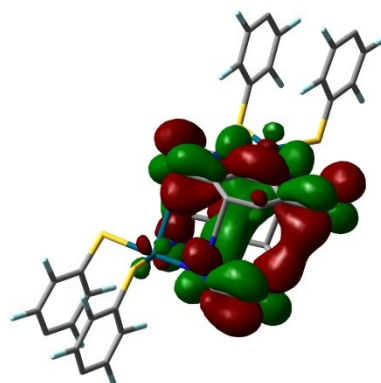

1

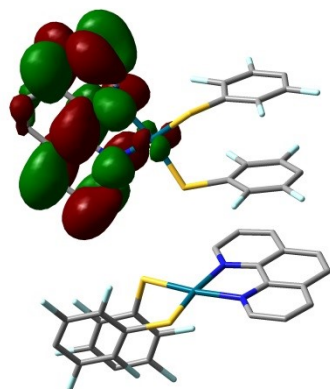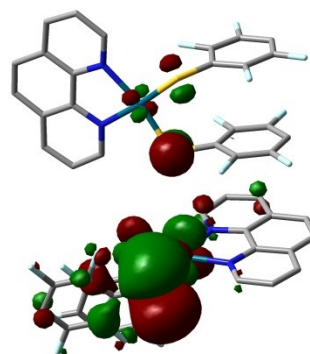

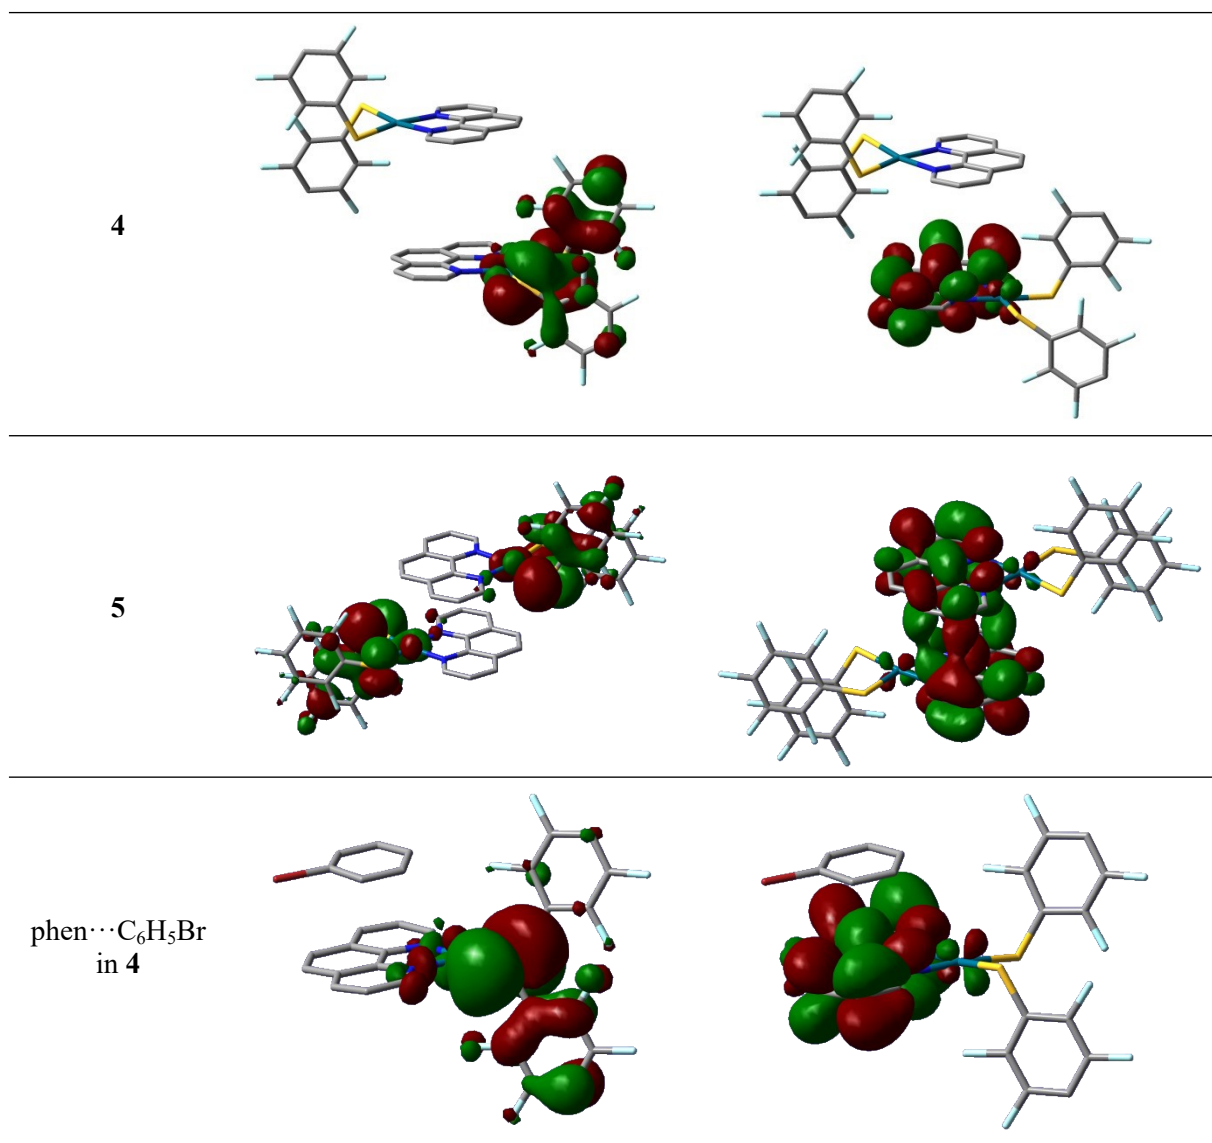

**Figure S14.** HOMO – LUMO plots for structures **1-5** and the interaction *phen*...C<sub>6</sub>H<sub>5</sub>Br.
